# Supplementary material for: Antifungal Resistance and Genotyping of Clinical Candida parapsilosis Complex in Japan
Source: MDPI journal article supplement (doi:10.3390/jof10010004), 2023-12-20
Supplement: s1 [file s1]

## **Antifungal resistance and genotyping of clinical *Candida parapsilosis* complex in Japan**

**Hazim O. Khalifa<sup>1,2,3#</sup>, Akira Watanabe<sup>1</sup>, Katsuhiko Kamei<sup>1</sup>**

<sup>1</sup> Division of Clinical Research, Medical Mycology Research Center, Chiba University,  
Chiba, Japan

<sup>2</sup>Department of Veterinary Medicine, College of Agriculture and Veterinary Medicine,  
United Arab Emirates University, Al Ain, P.O. Box 1555, United Arab Emirates

<sup>3</sup>Department of Pharmacology, Faculty of Veterinary Medicine, Kafrelsheikh University,  
Kafr El-Sheikh, Egypt

**Running title:** Acquired echinocandin resistance and genotyping of *C. parapsilosis*

<sup>#</sup>Address correspondence to Hazim O. Khalifa, [hazimkhalifa@uaeu.ac.ae](mailto:hazimkhalifa@uaeu.ac.ae);  
[hazem.khalifa1@vet.kfs.edu.eg](mailto:hazem.khalifa1@vet.kfs.edu.eg)

**Supplementary Table S1.** Characterization of clinical *C. parapsilosis* complex isolates recovered in this study\*.

| No.                    | IFM   | Source                         | Age | Sex | Isolation date | Information                                                                                                                                                                           | Notes        | Prefecture |
|------------------------|-------|--------------------------------|-----|-----|----------------|---------------------------------------------------------------------------------------------------------------------------------------------------------------------------------------|--------------|------------|
| <i>C. parapsilosis</i> |       |                                |     |     |                |                                                                                                                                                                                       |              |            |
| 1                      | 65757 | Nail                           | 73  | F   | April 2019     | Nail candidiasis with black nails. Received RVCZ and fosravuconazole treatment.                                                                                                       |              | Tokyo      |
| 2                      | 65553 | Catheter urine                 | 0   | F   | October 2018   | Very premature baby 25w 374g, from around 70d poor physical condition (fever, ascites), 80d intussusception laparotomy, 84d necrotizing enterocolitis resection, anasarca dehydration |              | Tokyo      |
| 3                      | 65484 | Blood                          | 5   | F   | September 2018 | Candidemia<br>Bulimia syndrome                                                                                                                                                        |              | Chiba      |
| 4                      | 65480 | Blood                          | Un  | Un  | 2018           | Candidemia                                                                                                                                                                            |              | Chiba      |
| 5                      | 65314 | Cornea                         | Un  | Un  | 2018           | Infectious crystalline keratopathy. received quinolone eye drops and steroid eye drops for a long period of time.                                                                     |              | Osaka      |
| 6                      | 65134 | Arterial blood, IVH tip        | 49  | M   | November 2017  | Hemiplegia after cerebral hemorrhage. Candidemia.                                                                                                                                     | Same patient | Fukuoka    |
| 7                      | 65133 |                                |     |     |                |                                                                                                                                                                                       |              |            |
| 8                      | 65119 | Abscess                        | Un  | Un  | October 9 2017 | Diabetes, necrosis of lower limbs.                                                                                                                                                    |              | Chiba      |
| 9                      | 65072 | Blood                          | 68  | M   | May 14 2017    | Inflammatory bowel disease (suspected ulcerative colitis). Candidemia                                                                                                                 |              | Tochigi    |
| 10                     | 64730 | Blood, catheter backflow blood | 55  | M   | September 2016 | Distal myopathy. Candidemia                                                                                                                                                           |              | Chiba      |

|    |       |                                |    |    |                |                                                                                                                   |              |       |
|----|-------|--------------------------------|----|----|----------------|-------------------------------------------------------------------------------------------------------------------|--------------|-------|
| 11 | 64459 | Blood                          | 92 | F  | September 2016 | During IVH intubation. Candidemia                                                                                 |              | Gunma |
| 12 | 63843 | Blood                          | 68 | M  | December 2015  | Ileus dehydration. Candidemia<br>History of MCFG use.                                                             |              | Chiba |
| 13 | 63706 | Blood                          | 45 | M  | November 2015  | Chronic active EB virus infection, NKT cell lymphoma. Candidemia.<br>History of MCFG and AMPH + VRCZ treatment.   |              | Chiba |
| 14 | 63460 | Blood                          | 76 | F  | May 2015       | Diabetes, pressure ulcers, pleural effusion. Candidemia.                                                          |              | Chiba |
| 15 | 63795 | Blood                          | 76 | M  | March 2015     | Candidemia.<br>History of FLCZ treatment.                                                                         |              | Chiba |
| 16 | 63259 | Liver                          | 2  | Un | January 2015   | Congenital biliary atresia after liver transplantation.<br>Suspected peritonitis.                                 |              | Tokyo |
| 17 | 63279 | Blood                          | 62 | M  | December 2014  | Diabetes, infective endocarditis. Candidemia.                                                                     |              | Osaka |
| 18 | 62818 | Catheter, venous blood         | 1  | M  | July 2014      | Left chest wall vascular lymphangioma (Gorham-Stout syndrome). Candidemia.                                        | Same patient | Kyoto |
| 19 | 62817 |                                |    |    |                |                                                                                                                   |              |       |
| 20 | 62626 | Puncture fluid of renal pelvis | 62 | M  | March 2014     | Bilateral hydronephrosis, right ureteral stent placement.<br>Suspected <i>Candida</i> urinary tract infection.    |              | Chiba |
| 21 | 62315 | Blood                          | 0  | M  | January 2014   | Acute megakaryocyte leukemia. Candidemia.<br>History of MCFG (preventive), Amphotericin (after fungal detection). |              | Akita |

|    |       |                |    |   |                |                                                                                                             |  |           |
|----|-------|----------------|----|---|----------------|-------------------------------------------------------------------------------------------------------------|--|-----------|
| 22 | 62624 | Venous blood   | 64 | M | October 2013   | Gastric cancer.<br>Candidemia                                                                               |  | Chiba     |
| 23 | 63792 | Blood          | 77 | M | September 2013 | Myocardial infarction, cholangitis.<br>Candidemia.                                                          |  | Chiba     |
| 24 | 63791 | Blood          | 0  | M | August 2013    | Candidemia.<br>History of MCFG treatment                                                                    |  | Chiba     |
| 25 | 62179 | Venous blood   | 2  | F | August 2013    | Single ventricle, asplenia, fatal<br>fasciitis.<br>Candidemia.                                              |  | Chiba     |
| 26 | 62685 | Arterial blood | 40 | M | May 2013       | Severe acute pancreatitis.<br>Candidemia.                                                                   |  | Chiba     |
| 27 | 62623 | Venous blood   | 74 | M | May 2013       | Hypopharynx cancer, esophageal<br>cancer.<br>Candidemia.                                                    |  | Chiba     |
| 28 | 62622 | Venous blood   | 60 | M | January 2013   | Graves' disease, small intestinal<br>stenosis.<br>Candidemia.                                               |  | Chiba     |
| 29 | 62340 | Blood          | 29 | F | January 2013   | Acute myeloid leukemia, catheter<br>use, died in August 2013.<br>Candidemia.                                |  | Chiba     |
| 30 | 61882 | Blood          | 53 | F | January 2013   | Died of a serious illness of Un cause.<br>bacteria were also detected in<br>aspirated sputum.<br>Candidemia |  | Chiba     |
| 31 | 61846 | Eye (cornea)   | 78 | M | January 2013   | Corneal mycosis.<br>Rice harvesting foreign matter on the<br>cornea.                                        |  | Tokushima |
| 32 | 61845 | Eye (cornea)   | 68 | M | January 2013   | Corneal mycosis.<br>Foreign matter on the cornea.                                                           |  | Tokushima |
| 33 | 61843 | Eye (cornea)   | 61 | M | January 2013   | Corneal mycosis.<br>Foreign matter on the cornea during<br>farm work.                                       |  | Tokushima |
| 34 | 61758 | Venous blood   | 4  | M | November 2012  | Corneal mycosis.                                                                                            |  | Chiba     |

|    |       |                   |    |   |                |                                                                        |  |       |
|----|-------|-------------------|----|---|----------------|------------------------------------------------------------------------|--|-------|
|    |       |                   |    |   |                | Severe cerebral palsy, mechanical ventilation, tube feeding.           |  |       |
| 35 | 61754 | Blood             | 76 | F | October 2012   | Gastric ulcer, use of vascular catheter.                               |  | Chiba |
| 36 | 63786 | Blood             | 61 | M | October 2012   | Brain tumor.<br>History of Micafungin treatment.                       |  | Chiba |
| 37 | 61750 | Arterial blood    | 61 | M | October 2012   | Cholecystitis                                                          |  | Chiba |
| 38 | 63785 | Blood             | 0  | M | July 2012      | Candidemia.<br>History of Micafungin treatment.                        |  | Chiba |
| 39 | 61434 | Blood             | 80 | M | July 2012      | Diabetes.<br>Candidemia.                                               |  | Tokyo |
| 40 | 63784 | Blood             | 78 | M | January 2012   | Diabetes, cerebral infarction.<br>Candidemia                           |  | Chiba |
| 41 | 61746 | Arterial blood    | 78 | M | January 2012   | Type 2 diabetes, transverse colon cancer, vascular catheter use, death |  | Chiba |
| 42 | 61745 | Venous blood      | 76 | M | January 2012   | Gastric cancer, Candidemia, vascular catheter use.                     |  | Chiba |
| 43 | 63783 | Blood             | 76 | M | January 2012   | Hypertension.<br>Candidemia.<br>History of Micafungin treatment.       |  | Chiba |
| 44 | 61192 | Blood             | 73 | M | December 2011  | Suppurative spondylitis, uses IVH catheter.<br>Candidemia.             |  | Chiba |
| 45 | 61739 | Venous blood      | 2  | M | November 2011  | CHARGE syndrome, use of vascular catheter, death on November 2011.     |  | Chiba |
| 46 | 61184 | Vascular catheter | 75 | M | September 2011 | Esophageal cancer.<br>Candidemia                                       |  | Chiba |
| 47 | 63782 | Blood             | 72 | M | September 2011 | Maxillary cancer.<br>Candidemia                                        |  | Chiba |
| 48 | 63812 | Blood             | 56 | M | September 2011 | Lung cancer.<br>Candidemia                                             |  | Chiba |

|    |       |                   |    |   |                |                                                                                                                                                                                                    |    |       |
|----|-------|-------------------|----|---|----------------|----------------------------------------------------------------------------------------------------------------------------------------------------------------------------------------------------|----|-------|
| 49 | 61194 | Blood             | 11 | F | September 2011 | Traffic trauma (fracture, organ damage).<br>NB, intra-abdominal abscess<br>Candida albicans was recovered.<br>Candidemia.<br>Antifungal drug use and oral anti-allergic drug for atopic dermatitis |    | Chiba |
| 50 | 63781 | Blood             | 65 | M | August 2011    | Candidemia                                                                                                                                                                                         |    | Chiba |
| 51 | 61182 | Venous blood      | 76 | M | August 2011    | Prostatic gland cancer, portal thrombosis,<br>Disseminated intravascular coagulation (DIC).<br>Candidemia.<br>Use of immunosuppressive medicine,                                                   |    | Chiba |
| 52 | 61018 | Blood             | 4  | F | August 2011    | Kawasaki disease, adenovirus infection.                                                                                                                                                            | Un | Chiba |
| 53 | 61171 | Vascular catheter | 56 | M | June 2011      | Esophageal cancer, bronchial fistula.<br>Candidemia                                                                                                                                                | Un | Chiba |
| 54 | 61008 | Venous blood      | 59 | M | March 2011     | Ruptured aneurysm.                                                                                                                                                                                 | Un | Chiba |
| 55 | 59620 | Blood             | 84 | M | July 2010      | Ileus, intra-abdominal abscess.<br>Candidemia.<br>Long-term use of vascular catheter.                                                                                                              |    | Chiba |
| 56 | 61201 | Arterial blood    | 71 | M | May 2010       | Hepatocellular carcinoma.<br>Candidemia.<br>History of vascular catheter use.                                                                                                                      |    | Chiba |
| 57 | 61199 | Vascular catheter | 51 | M | April 2010     | Cardia cancer.<br>History of vascular catheter use.                                                                                                                                                |    | Chiba |
| 58 | 61198 | Vascular catheter | 79 | M | April 2010     | Pneumococcal sepsis.<br>History of vascular catheter use.                                                                                                                                          |    | Chiba |
| 59 | 61002 | Venous blood      | 76 | F | March 2010     | Cerebral infarction and tuberculosis,                                                                                                                                                              |    | Chiba |
| 60 | 61001 | Venous blood      | 56 | M | February 2010  | Diabetes and malignant lymphoma of the skin.                                                                                                                                                       |    | Chiba |
| 61 | 61195 | Vascular catheter | 64 | F | January 2010   | Esophageal cancer.                                                                                                                                                                                 |    | Chiba |
| 62 | 58051 | Blood             | 65 | F | July 2008      | Unknown condition                                                                                                                                                                                  |    | Kyoto |

|                         |       |          |    |    |                |                                                                                                                                                                                                                                                                                                             |              |          |
|-------------------------|-------|----------|----|----|----------------|-------------------------------------------------------------------------------------------------------------------------------------------------------------------------------------------------------------------------------------------------------------------------------------------------------------|--------------|----------|
|                         |       |          |    |    |                | The patient received MCFG and VRCZ.                                                                                                                                                                                                                                                                         |              |          |
| 63                      | 55019 | Blood    | 2  | F  | July 2006      | Patient developed autoimmune enteritis at the age of one. Disseminated intravascular coagulation (twice), multiple organ failure, and fungi suspected to be <i>Candida</i> were found in blood cultures. The patient received prednisolone, azathioprine in the abdomen, in addition to FCZ, MCFG, and VCZ. |              | Aichi    |
| 64                      | 54789 | Un       | Un | Un | July 2005      | After the accident, skin grafting was performed in childhood, but a granulomatous rash appeared and did not heal.                                                                                                                                                                                           |              | Gifu     |
| 65                      | 64439 | Cornea   | Un | Un | Un             | Un                                                                                                                                                                                                                                                                                                          |              | Un       |
| <i>C. metapsilosis</i>  |       |          |    |    |                |                                                                                                                                                                                                                                                                                                             |              |          |
| 66                      | 66283 | Blood    | 71 | M  | November 2019  | T-cell lymphoma                                                                                                                                                                                                                                                                                             |              | Kanagawa |
| 67                      | 64455 | Blood    | 0  | F  | November 2019  | Acute lymphocytic leukemia                                                                                                                                                                                                                                                                                  |              | Chiba    |
| 68                      | 63811 | Blood    | 56 | M  | September 2011 | Lung cancer                                                                                                                                                                                                                                                                                                 |              | Chiba    |
| 69                      | 63788 | Blood    | 81 | M  | May 2013       | Duodenal ulcer, cerebral infarction<br>History of MCFG treatment.                                                                                                                                                                                                                                           |              | Chiba    |
| 70                      | 63787 | Blood    | 59 | M  | November 2012  | No information<br>History of MCFG treatment.                                                                                                                                                                                                                                                                |              | Chiba    |
| 71                      | 52586 | otorrhea | Un | Un | Un             | Un                                                                                                                                                                                                                                                                                                          |              | Tokyo    |
| 72                      | 52581 | otorrhea | Un | Un | Un             | Un                                                                                                                                                                                                                                                                                                          |              | Tokyo    |
| 73                      | 52523 | otorrhea | Un | Un | Un             | Un                                                                                                                                                                                                                                                                                                          |              | Tokyo    |
| 74                      | 52516 | Pus      | Un | Un | Un             | Un                                                                                                                                                                                                                                                                                                          |              | Tokyo    |
| <i>C. orthopsilosis</i> |       |          |    |    |                |                                                                                                                                                                                                                                                                                                             |              |          |
| 75                      | 65317 | Blood    | 14 | F  | 2018           |                                                                                                                                                                                                                                                                                                             | Same patient | Saitama  |

|    |       |                      |    |    |              |                                                                                      |    |       |
|----|-------|----------------------|----|----|--------------|--------------------------------------------------------------------------------------|----|-------|
| 76 | 65316 |                      |    |    |              | Neuroblastoma, acute myeloid leukemia and death                                      |    |       |
| 77 | 65099 | Venous blood         | 79 | M  | October 2017 | Ischemic colitis after abdominal aortic aneurysm surgery. History of FLCZ treatment. |    | Chiba |
| 78 | 52485 | Feces                | Un | Un | Un           | Un                                                                                   | Un | Tokyo |
| 79 | 52457 | Pharyngeal secretion | Un | Un | Un           | Un                                                                                   | Un | Tokyo |

\* Abbreviation: M, male; F, Female; Un, Known.



**Supplementary Table S2.** Oligonucleotides used in this study for PCR and microsatellite genotyping experiments.

| Primer name | Sequence                            | Target gene/Purpose                             | PCR product sizes | Reference  |
|-------------|-------------------------------------|-------------------------------------------------|-------------------|------------|
| CP_ERG_FW   | CCCATCGTTTAAAACATCCAAAGACCTTAGC     | Cp <i>ERG11</i> /PCR and sequencing             | 1921 bp           | This study |
| CP_ERG_SQ1  | GGAAAAGGTGTTATTTTCGATTGTCCG         | Cp <i>ERG11</i> /sequencing                     |                   | This study |
| CP_ERG_SQ2  | TTGATTGGTGTGTTTGATGGGAGGACAGC       | Cp <i>ERG11</i> /sequencing                     |                   | This study |
| CP_ERG_RV   | GAATTGTGGTGGTTTTACTTAGATAATTGGTG    | Cp <i>ERG11</i> /PCR and sequencing             |                   | This study |
| CO_ERG_FW   | GTAATCAAAGTGTTTCCTAT                | Co <i>ERG11</i> /PCR and sequencing             |                   | 35         |
| CO_ERG_SQ1  | GTGGTGTTGTTGATGTATTGCAATCGC         | Co <i>ERG11</i> /sequencing                     |                   | This study |
| CO_ERG_SQ2  | GCCATTGGTAAACAACACCATCAAAG          | Co <i>ERG11</i> /sequencing                     |                   | This study |
| CO_ERG_RV   | ACGGGGTTACACTGATTCTA                | Co <i>ERG11</i> /PCR and sequencing             |                   | 35         |
| CP_HS1,2_FW | GCTGTCATGCCTTTGGGAGGTT              | Cp <i>FKSI</i> (HS1 and HS2)/PCR and sequencing | 2633 bp           | This study |
| CP_HS1_RV   | GTCAATAGCTAACAAATGTTCTCTGTACATGGA   | Cp <i>FKSI</i> (HS1)/sequencing                 |                   | This study |
| CP_HS2_FW   | AGAGAATATTACTACTTGTCAACTCAATTGCC    | Cp <i>FKSI</i> (HS2)/sequencing                 |                   | This study |
| CP_HS1,2_RV | CTAGCACCCATATAAATTGACGAGTCAGC       | Cp <i>FKSI</i> (HS1 and HS2)/PCR and sequencing |                   | This study |
| CM_HS1,2_FW | GCCGGATTGACCTTGATTCCAAGTCGG         | Cm <i>FKSI</i> (HS1 and HS2)/PCR and sequencing | 2611 bp           | This study |
| CM_HS1_RV   | GGTAATCTGGTGAAAATATTTCTCCATGGTGTC   | Cm <i>FKSI</i> (HS1)/sequencing                 |                   | This study |
| CM_HS2_FW   | GGTGCCGGTATGGGTGAACAGATGTTGTC       | Cm <i>FKSI</i> (HS2)/sequencing                 |                   | This study |
| CM_HS1,2_RV | CAACAGTCATATCAGTAAAGACAGATGATGAATAG | Cm <i>FKSI</i> (HS1 and HS2)/PCR and sequencing |                   | This study |
| CO_HS1,2_FW | CTTCGCTGTTATGCCTTTGGGAGGATTG        | Co <i>FKSI</i> (HS1 and HS2)/PCR and sequencing | 2610 bp           | This study |

|             |                                 |                                                     |  |            |
|-------------|---------------------------------|-----------------------------------------------------|--|------------|
| CO_HS1_RV   | GAGTAGATTCTCTTTGGCAATCTGGTG     | <i>CoFKSI</i> (HS1)/sequencing                      |  | This study |
| CO_HS2_FW   | GTCATTCTACTATGGTCACCCAGGTTTCC   | <i>CoFKSI</i> (HS2)/sequencing                      |  | This study |
| CO_HS1,2_RV | GCGAAACGCGAATACAAGATGGAGAATGGG  | <i>CoFKSI</i> (HS1 and HS2)/PCR and sequencing      |  | This study |
| CP1-F       | VIC 5' AAAGTGCTACACACGCATCG     | Microsatellite genotyping of <i>C. parapsilosis</i> |  | 18         |
| CP1-R       | GGCTTGCAATTTTCATTTCT            |                                                     |  |            |
| CP4-F       | PET 5' CAAATCATCCAGCTTCAAACC    |                                                     |  |            |
| CP4-R       | CATCAAACAAGAATTCGATATCAC        |                                                     |  |            |
| CP6-F       | FAM 5' CAGGAACAGGACAATGGTGA     |                                                     |  |            |
| CP6-R       | TCTGGAGCCTCTAGGACGTTT-          |                                                     |  |            |
| B5-F        | FAM 5' AGGTTTGTAGTAGTGTCCCTATGG |                                                     |  |            |
| B5-R        | TATCTCTCTCGCCATTTGAACG          |                                                     |  |            |

**Supplementary Table S3.** MIC values of all tested isolates against wide range of antifungal agents.

| No                     | IFM   | MFG  | CAS  | AMB | 5FC   | FLC  | ITC    | VRC    | MZ    |
|------------------------|-------|------|------|-----|-------|------|--------|--------|-------|
| <i>C. parapsilosis</i> |       |      |      |     |       |      |        |        |       |
| 1                      | 65757 | 1    | 1    | 0.5 | ≤0.12 | 0.5  | 0.06   | ≤0.015 | 0.25  |
| 2                      | 65553 | 0.5  | 0.5  | 0.5 | ≤0.12 | 0.25 | 0.03   | ≤0.015 | 0.06  |
| 3                      | 65484 | 1    | 1    | 1   | ≤0.12 | 0.5  | ≤0.015 | ≤0.015 | ≤0.03 |
| 4                      | 65480 | 1    | 1    | 1   | ≤0.12 | 0.5  | 0.03   | ≤0.015 | 0.06  |
| 5                      | 65314 | 1    | 1    | 1   | ≤0.12 | 0.25 | ≤0.015 | ≤0.015 | ≤0.03 |
| 6                      | 65134 | 0.5  | 0.25 | 1   | ≤0.12 | 0.5  | 0.03   | ≤0.015 | 0.06  |
| 7                      | 65133 | 0.5  | 0.5  | 1   | ≤0.12 | 0.5  | 0.03   | ≤0.015 | 0.12  |
| 8                      | 65119 | 0.5  | 0.5  | 1   | ≤0.12 | 0.5  | 0.06   | ≤0.015 | 0.06  |
| 9                      | 65072 | 1    | 1    | 1   | ≤0.12 | 0.25 | 0.03   | ≤0.015 | 0.06  |
| 10                     | 64730 | 1    | 1    | 1   | ≤0.12 | 0.5  | 0.06   | ≤0.015 | 0.06  |
| 11                     | 64459 | 1    | 1    | 1   | ≤0.12 | 0.25 | 0.06   | ≤0.015 | 0.06  |
| 12                     | 63843 | 1    | 1    | 1   | ≤0.12 | 0.25 | 0.03   | ≤0.015 | 0.06  |
| 13                     | 63706 | 0.5  | 0.5  | 1   | ≤0.12 | 0.25 | 0.03   | ≤0.015 | 0.06  |
| 14                     | 63460 | 1    | 1    | 0.5 | ≤0.12 | 0.25 | 0.03   | ≤0.015 | 0.06  |
| 15                     | 63795 | 1    | 1    | 1   | ≤0.12 | 0.5  | 0.03   | ≤0.015 | 0.12  |
| 16                     | 63259 | 0.25 | 0.5  | 1   | ≤0.12 | 0.25 | ≤0.015 | ≤0.015 | ≤0.03 |
| 17                     | 63279 | 0.5  | 0.5  | 0.5 | ≤0.12 | 0.25 | 0.03   | ≤0.015 | ≤0.03 |
| 18                     | 62818 | 1    | 1    | 1   | ≤0.12 | 0.25 | 0.03   | ≤0.015 | ≤0.03 |
| 19                     | 62817 | 1    | 1    | 1   | ≤0.12 | 0.5  | 0.03   | ≤0.015 | 0.06  |
| 20                     | 62626 | 1    | 1    | 1   | ≤0.12 | 0.25 | ≤0.015 | ≤0.015 | ≤0.03 |
| 21                     | 62315 | 0.5  | 0.5  | 1   | ≤0.12 | 0.25 | 0.03   | ≤0.015 | ≤0.03 |
| 22                     | 62624 | 0.5  | 0.5  | 1   | ≤0.12 | 0.5  | ≤0.015 | ≤0.015 | ≤0.03 |
| 23                     | 63792 | 0.5  | 1    | 1   | ≤0.12 | 0.5  | 0.06   | ≤0.015 | 0.06  |
| 24                     | 63791 | 1    | 1    | 1   | ≤0.12 | 0.25 | 0.03   | ≤0.015 | 0.06  |
| 25                     | 62179 | 1    | 1    | 1   | ≤0.12 | 0.5  | 0.03   | ≤0.015 | 0.06  |
| 26                     | 62685 | 1    | 1    | 1   | ≤0.12 | 1    | 0.12   | 0.06   | 0.25  |
| 27                     | 62623 | 1    | 1    | 1   | ≤0.12 | 0.5  | 0.03   | ≤0.015 | ≤0.03 |
| 28                     | 62622 | 0.5  | 1    | 1   | ≤0.12 | 0.5  | 0.06   | 0.03   | 0.06  |
| 29                     | 62340 | 1    | 1    | 1   | ≤0.12 | 0.5  | 0.03   | ≤0.015 | 0.06  |
| 30                     | 61882 | 1    | 1    | 1   | ≤0.12 | 0.25 | 0.03   | ≤0.015 | ≤0.03 |
| 31                     | 61846 | 1    | 1    | 1   | ≤0.12 | 0.5  | 0.03   | ≤0.015 | 0.06  |
| 32                     | 61845 | 1    | 1    | 1   | ≤0.12 | 0.5  | 0.06   | 0.03   | 0.12  |
| 33                     | 61843 | 1    | 1    | 1   | ≤0.12 | 0.5  | 0.06   | ≤0.015 | 0.12  |
| 34                     | 61758 | 1    | 1    | 1   | ≤0.12 | 0.5  | 0.03   | ≤0.015 | 0.06  |
| 35                     | 61754 | 0.5  | 1    | 1   | ≤0.12 | 0.5  | 0.06   | ≤0.015 | 0.12  |
| 36                     | 63786 | 1    | 1    | 1   | ≤0.12 | 0.5  | 0.06   | ≤0.015 | 0.12  |
| 37                     | 61750 | 1    | 1    | 1   | ≤0.12 | 0.25 | 0.03   | ≤0.015 | 0.12  |
| 38                     | 63785 | 1    | 1    | 1   | ≤0.12 | 0.5  | 0.03   | ≤0.015 | 0.06  |
| 39                     | 61434 | 1    | 1    | 1   | ≤0.12 | 0.5  | 0.06   | ≤0.015 | 0.06  |

|                         |       |      |     |     |       |      |      |        |       |
|-------------------------|-------|------|-----|-----|-------|------|------|--------|-------|
| 40                      | 63784 | 1    | 1   | 1   | ≤0.12 | 0.5  | 0.03 | ≤0.015 | 0.06  |
| 41                      | 61746 | 1    | 1   | 1   | ≤0.12 | 0.5  | 0.06 | ≤0.015 | 0.12  |
| 42                      | 61745 | 1    | 1   | 1   | ≤0.12 | 0.5  | 0.03 | 0.03   | 0.12  |
| 43                      | 63783 | 1    | 1   | 1   | ≤0.12 | 0.5  | 0.03 | ≤0.015 | 0.25  |
| 44                      | 61192 | 0.5  | 1   | 1   | ≤0.12 | 0.12 | 0.06 | ≤0.015 | 0.25  |
| 45                      | 61739 | 1    | 1   | 1   | ≤0.12 | 0.5  | 0.06 | ≤0.015 | 0.12  |
| 46                      | 61184 | 1    | 1   | 1   | ≤0.12 | 0.5  | 0.06 | 0.03   | 0.12  |
| 47                      | 63782 | 1    | 1   | 1   | ≤0.12 | 0.25 | 0.03 | ≤0.015 | 0.03  |
| 48                      | 63812 | 1    | 1   | 1   | ≤0.12 | 0.25 | 0.03 | ≤0.015 | 0.06  |
| 49                      | 61194 | 1    | 1   | 1   | ≤0.12 | 0.25 | 0.03 | ≤0.015 | 0.12  |
| 50                      | 63781 | 1    | 1   | 0.5 | ≤0.12 | 0.25 | 0.06 | ≤0.015 | 0.12  |
| 51                      | 61182 | 1    | 1   | 1   | ≤0.12 | 0.5  | 0.03 | ≤0.015 | 0.12  |
| 52                      | 61018 | 1    | 1   | 1   | ≤0.12 | 0.25 | 0.03 | ≤0.015 | 0.06  |
| 53                      | 61171 | 1    | 1   | 1   | ≤0.12 | 0.5  | 0.06 | ≤0.015 | 0.25  |
| 54                      | 61008 | 1    | 1   | 1   | ≤0.12 | 0.5  | 0.06 | 0.03   | 0.12  |
| 55                      | 59620 | 1    | 1   | 1   | ≤0.12 | 0.5  | 0.03 | ≤0.015 | ≤0.03 |
| 56                      | 61201 | 1    | 1   | 1   | ≤0.12 | 0.5  | 0.03 | ≤0.015 | 0.06  |
| 57                      | 61199 | 1    | 1   | 1   | ≤0.12 | 0.25 | 0.03 | ≤0.015 | 0.06  |
| 58                      | 61198 | 1    | 1   | 1   | ≤0.12 | 0.5  | 0.03 | ≤0.015 | ≤0.03 |
| 59                      | 61002 | 1    | 1   | 0.5 | ≤0.12 | 0.5  | 0.03 | ≤0.015 | ≤0.03 |
| 60                      | 61001 | 1    | 1   | 1   | ≤0.12 | 0.5  | 0.06 | 0.03   | 0.06  |
| 61                      | 61195 | 1    | 1   | 1   | ≤0.12 | 0.25 | 0.03 | ≤0.015 | ≤0.03 |
| 62                      | 58051 | 0.5  | 1   | 1   | ≤0.12 | 0.25 | 0.03 | ≤0.015 | ≤0.03 |
| 63                      | 55019 | 1    | 1   | 1   | ≤0.12 | 1    | 0.12 | 0.03   | 0.25  |
| 64                      | 54789 | 1    | 1   | 0.5 | ≤0.12 | 0.25 | 0.03 | ≤0.015 | 0.06  |
| 65                      | 64439 | 0.25 | 0.5 | 1   | ≤0.12 | 2    | 0.06 | 0.03   | 0.12  |
| <i>C. metapsilosis</i>  |       |      |     |     |       |      |      |        |       |
| 66                      | 66283 | 0.06 | 0.5 | 0.5 | ≤0.12 | 1    | 0.06 | 0.03   | 0.25  |
| 67                      | 64455 | 0.25 | 0.5 | 1   | ≤0.12 | 0.5  | 0.12 | 0.03   | 0.12  |
| 68                      | 63811 | 0.25 | 0.5 | 1   | ≤0.12 | 2    | 0.12 | 0.03   | 0.25  |
| 69                      | 63788 | 0.25 | 0.5 | 1   | ≤0.12 | 2    | 0.12 | 0.03   | 0.25  |
| 70                      | 63787 | 0.25 | 0.5 | 1   | ≤0.12 | 2    | 0.12 | 0.03   | 0.25  |
| 71                      | 52586 | 0.25 | 0.5 | 1   | ≤0.12 | 4    | 0.06 | 0.06   | 0.25  |
| 72                      | 52581 | 0.25 | 0.5 | 1   | ≤0.12 | 1    | 0.12 | 0.03   | 0.25  |
| 73                      | 52523 | 0.25 | 0.5 | 1   | ≤0.12 | 1    | 0.12 | 0.03   | 0.12  |
| 74                      | 52516 | 0.25 | 0.5 | 1   | ≤0.12 | 1    | 0.06 | 0.03   | 0.12  |
| <i>C. orthopsilosis</i> |       |      |     |     |       |      |      |        |       |
| 75                      | 65317 | 0.25 | 0.5 | 1   | ≤0.12 | 0.5  | 0.06 | ≤0.015 | 0.12  |
| 76                      | 65316 | 0.5  | 0.5 | 0.5 | ≤0.12 | 0.5  | 0.06 | ≤0.015 | 0.12  |
| 77                      | 65099 | 0.25 | 0.5 | 1   | ≤0.12 | 0.5  | 0.12 | 0.03   | 0.25  |
| 78                      | 52485 | 0.12 | 0.5 | 0.5 | ≤0.12 | 0.5  | 0.06 | ≤0.015 | 0.12  |
| 79                      | 52457 | 0.25 | 0.5 | 1   | ≤0.12 | 2    | 0.12 | 0.03   | 0.25  |

**Supplementary Table S4.** Mutations detected in *ERG11* gene for both *C. parapsilosis* and *C. orthopsilosis*.

| No                            | IFM   | <i>ERG11</i> synonymous mutations | <i>ERG11</i> nonsynonymous mutations |
|-------------------------------|-------|-----------------------------------|--------------------------------------|
| <b><i>C. parapsilosis</i></b> |       |                                   |                                      |
| 1                             | 65757 | T591C                             |                                      |
| 2                             | 65553 | T591C                             |                                      |
| 3                             | 65484 | T591C                             |                                      |
| 4                             | 65480 | T591C                             | R398I                                |
| 5                             | 65314 | T591C                             |                                      |
| 6                             | 65134 | T591C                             |                                      |
| 7                             | 65133 | T591C                             |                                      |
| 8                             | 65119 | T591C                             | R398I                                |
| 9                             | 65072 | T591C                             | R398I                                |
| 10                            | 64730 | T591C                             |                                      |
| 11                            | 64459 | T591C                             | R398I                                |
| 12                            | 63843 | T591C                             |                                      |
| 13                            | 63706 | T591C                             |                                      |
| 14                            | 63460 | T591C                             | R398I                                |
| 15                            | 63795 | T591C                             | R398I                                |
| 16                            | 63259 | T591C                             |                                      |
| 17                            | 63279 | T591C                             |                                      |
| 18                            | 62818 | T591C                             |                                      |
| 19                            | 62817 | T591C                             |                                      |
| 20                            | 62626 | T591C                             |                                      |
| 21                            | 62315 | T591C                             |                                      |
| 22                            | 62624 | T591C                             |                                      |
| 23                            | 63792 | T591C                             | R398I                                |
| 24                            | 63791 | T591C                             |                                      |
| 25                            | 62179 | T591C                             |                                      |
| 26                            | 62685 | T591C                             |                                      |
| 27                            | 62623 | T591C                             | R398I                                |
| 28                            | 62622 | T591C                             | R398I                                |
| 29                            | 62340 | T591C                             |                                      |
| 30                            | 61882 | T591C                             | R398I                                |
| 31                            | 61846 | T591C                             | R398I                                |
| 32                            | 61845 | T591C                             | R398I                                |
| 33                            | 61843 | T591C                             | R398I                                |
| 34                            | 61758 | T591C                             | R398I                                |
| 35                            | 61754 | T591C                             |                                      |
| 36                            | 63786 | T591C                             | R398I                                |
| 37                            | 61750 | T591C                             | R398I                                |

|    |       |                         |                            |
|----|-------|-------------------------|----------------------------|
| 38 | 63785 | T591C                   | R398I                      |
| 39 | 61434 | T591C                   |                            |
| 40 | 63784 | T591C                   | R398I                      |
| 41 | 61746 | T591C                   | R398I                      |
| 42 | 61745 | T591C                   | R398I                      |
| 43 | 63783 | T591C                   | R398I                      |
| 44 | 61192 | T591C                   | R398I                      |
| 45 | 61739 | T591C                   | R398I                      |
| 46 | 61184 | T591C                   | R398I                      |
| 47 | 63782 | T591C                   |                            |
| 48 | 63812 | T591C                   |                            |
| 49 | 61194 | T591C                   | R398I                      |
| 50 | 63781 | T591C                   |                            |
| 51 | 61182 | T591C                   |                            |
| 52 | 61018 | T591C                   | R398I                      |
| 53 | 61171 | T591C                   |                            |
| 54 | 61008 | T591C                   | R398I                      |
| 55 | 59620 | T591C                   |                            |
| 56 | 61201 | T591C                   | R398I                      |
| 57 | 61199 | T591C                   | R398I                      |
| 58 | 61198 | T591C                   |                            |
| 59 | 61002 | T591C                   | R398I                      |
| 60 | 61001 | T591C                   | R398I                      |
| 61 | 61195 | T591C                   | R398I                      |
| 62 | 58051 | T591C                   | R398I                      |
| 63 | 55019 | T591C                   |                            |
| 64 | 54789 | T591C                   |                            |
| 65 | 64439 | T591C                   |                            |
|    |       | <i>C. orthopsilosis</i> |                            |
| 66 | 65317 |                         | Y13C, F420S                |
| 67 | 65316 |                         | Y13C, F420S                |
| 68 | 65099 |                         | Q211K, F420S, A421V, V481I |
| 69 | 52485 |                         | Y13C, F420S                |
| 70 | 52457 |                         | Y13C, F420S                |

**Supplementary Table S5.** *Candida parapsilosis* strain typing results using microsatellite genotyping.

| Genotype | No. of isolates (patients) per genotype | Concatenated diploid genotype |
|----------|-----------------------------------------|-------------------------------|
| 1.       | 4 (4)                                   | 252252376442136136218313      |
| 2.       | 3 (3)                                   | 247255313313140140273273      |
| 3.       | 2 (2)                                   | 245250313313134140269287      |
| 4.       | 1 (1)                                   | 229294313313136136273292      |
| 5.       | 1 (1)                                   | 229294313313156156273292      |
| 6.       | 1 (1)                                   | 302247346346136136218218      |
| 7.       | 1 (1)                                   | 252247329326137139257271      |
| 8.       | 1 (1)                                   | 245250313313140140287287      |
| 9.       | 1 (1)                                   | 250252376376136136307307      |
| 10.      | 1 (1)                                   | 230250289289136162275295      |
| 11.      | 1 (1)                                   | 248250376445136136218340      |
| 12.      | 1 (1)                                   | 230252376376136136310310      |
| 13.      | 1 (1)                                   | 216248320320140140287287      |
| 14.      | 1 (1)                                   | 245250313313140140269287      |
| 15.      | 1 (1)                                   | 230250376376134134275325      |
| 16.      | 1 (1)                                   | 250250376439136136218218      |
| 17.      | 1 (1)                                   | 245250313313142142255255      |
| 18.      | 1 (1)                                   | 245250313313140140269269      |
| 19.      | 1 (1)                                   | 248250253313156156278278      |
| 20.      | 1 (1)                                   | 248248313313152152264264      |
| 21.      | 1 (1)                                   | 230250376376136136275325      |
| 22.      | 1 (1)                                   | 245252313313140140272272      |
| 23.      | 1 (1)                                   | 228228264336118118298298      |
| 24.      | 1 (1)                                   | 248250358358136136278298      |
| 25.      | 1 (1)                                   | 250250379479136136218310      |
| 26.      | 1 (1)                                   | 250250397397136136272272      |
| 27.      | 1 (1)                                   | 248252313313140140271287      |
| 28.      | 1 (1)                                   | 248250403403134146293307      |
| 29.      | 1 (1)                                   | 250259376423136136218310      |
| 30.      | 1 (1)                                   | 230250382382136136310310      |
| 31.      | 1 (1)                                   | 250250376376136136218218      |
| 32.      | 1 (1)                                   | 250250379379136136218218      |
| 33.      | 1 (1)                                   | 248248317317116116298298      |
| 34.      | 1 (1)                                   | 252252400400136136310310      |
| 35.      | 1 (1)                                   | 250250345345116116296296      |
| 36.      | 1 (1)                                   | 252252376442136136310310      |
| 37.      | 1 (1)                                   | 232252376376136136340340      |
| 38.      | 1 (1)                                   | 252252376391146146307307      |
| 39.      | 1 (1)                                   | 232252376407136162276296      |
| 40.      | 1 (1)                                   | 250250332332154154265265      |
| 41.      | 1 (1)                                   | 232252379379136136279279      |
| 42.      | 1 (1)                                   | 252252291326152152298298      |
| 43.      | 1 (1)                                   | 252252373442136136218218      |
| 44.      | 1 (1)                                   | 241269313313197197296296      |

|     |       |                          |
|-----|-------|--------------------------|
| 45. | 1 (1) | 252252346386138138218276 |
| 46. | 1 (1) | 252252376376136136293298 |
| 47. | 1 (1) | 247252313313140140271287 |
| 48. | 1 (1) | 255255376376136136293307 |
| 49. | 1 (1) | 255255379379136136213293 |
| 50. | 1 (1) | 232252376376136136276328 |
| 51. | 1 (1) | 250250400400134146290325 |
| 52. | 1 (1) | 252252316316136136298298 |
| 53. | 1 (1) | 232252376376136162276296 |



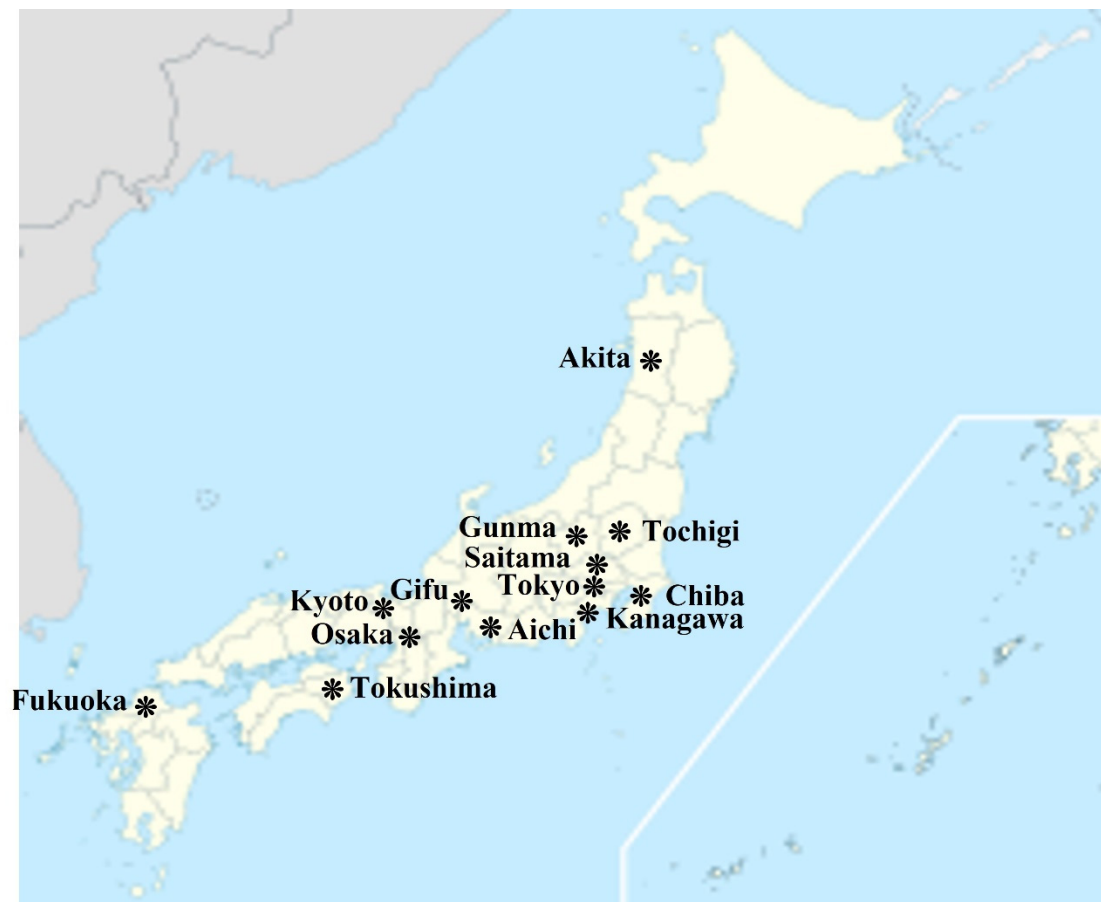

Supplementary Figure S1. Map of the location of isolate collections.

### *C. parapsilosis* FKS1 mapping

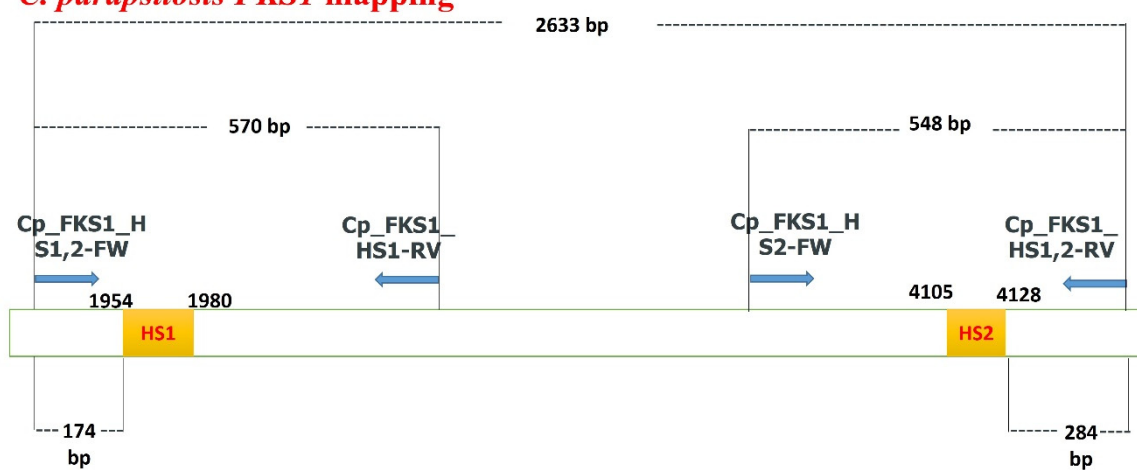

Supplementary Figure S2. Primer mapping for PCR and sequencing of *C. parapsilosis* FKS1 hot spot regions.

### *C. metapsilosis* *FKS1* mapping

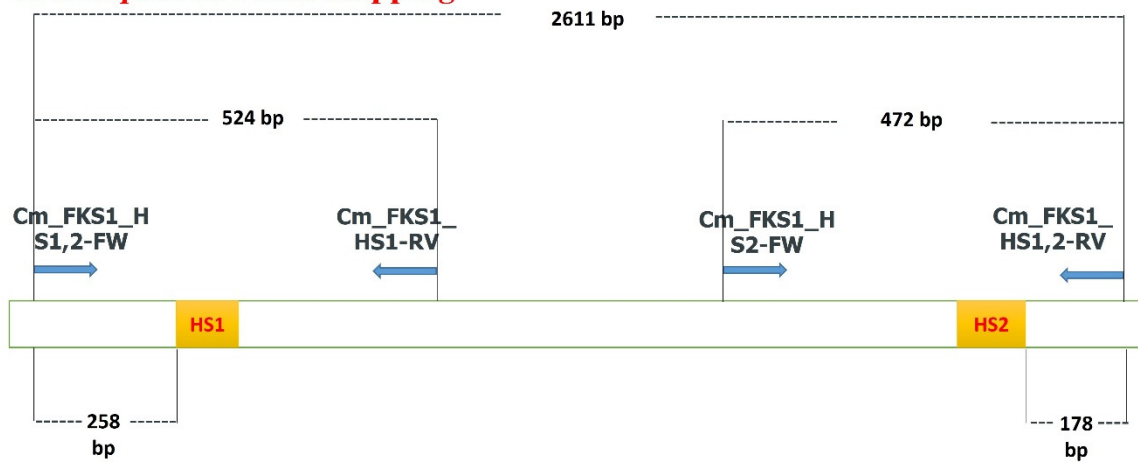

**Supplementary Figure S3.** Primer mapping for PCR and sequencing of *C. metapsilosis* *FKS1* hot spot regions.

### *C. orthopsilosis* *FKS1* mapping

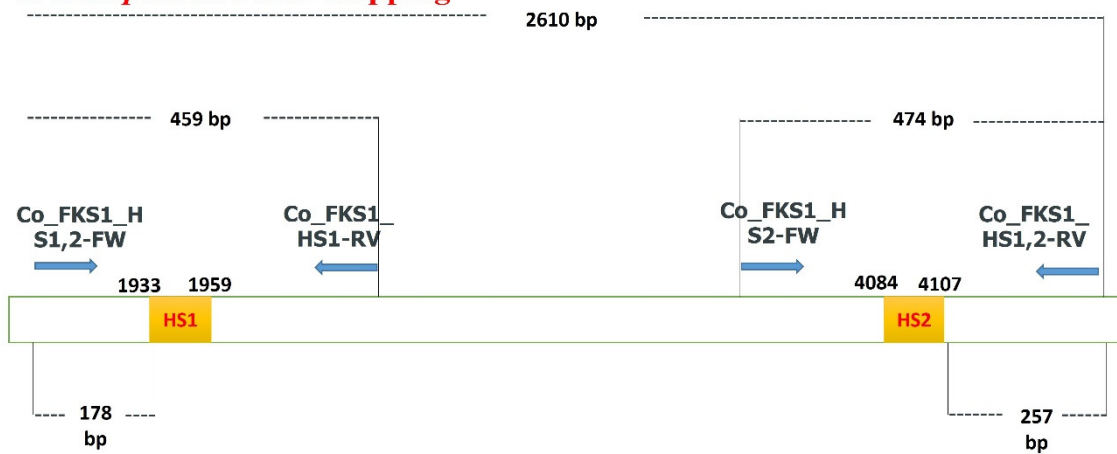

**Supplementary Figure S4.** Primer mapping for PCR and sequencing of *C. orthopsilosis* *FKS1* hot spot regions.

**References:**

- 18- Sabino, R.; Sampaio, P.; Rosado, L.; Stevens, D.A.; Clemons, K.V.; Pais, C. New microsatellite markers able to distinguish among *Candida parapsilosis Sensu Stricto* isolates. J. Clin. Microbiol. 2010, 48, 1677–1682. <https://doi.org/10.1128/JCM.02151-09>.
- 35- Rizzato C, Poma N, Zoppo M, Posteraro B, Mello E, Bottai D, Lupetti A, Sanguinetti M, Tavanti A. CoERG11 A395T mutation confers azole resistance in *Candida orthopsilosis* clinical isolates. J. Antimicrob. Chemother. 2018, 73, 1815–1822.
